# Supplementary figures and images for: The Potential of Soluble Proteins in High-Moisture Soy Protein–Gluten Extrudates Preparation
Source: MDPI journal article supplement (doi:10.3390/polym15244686), 2023-12-12

## Supplementary data

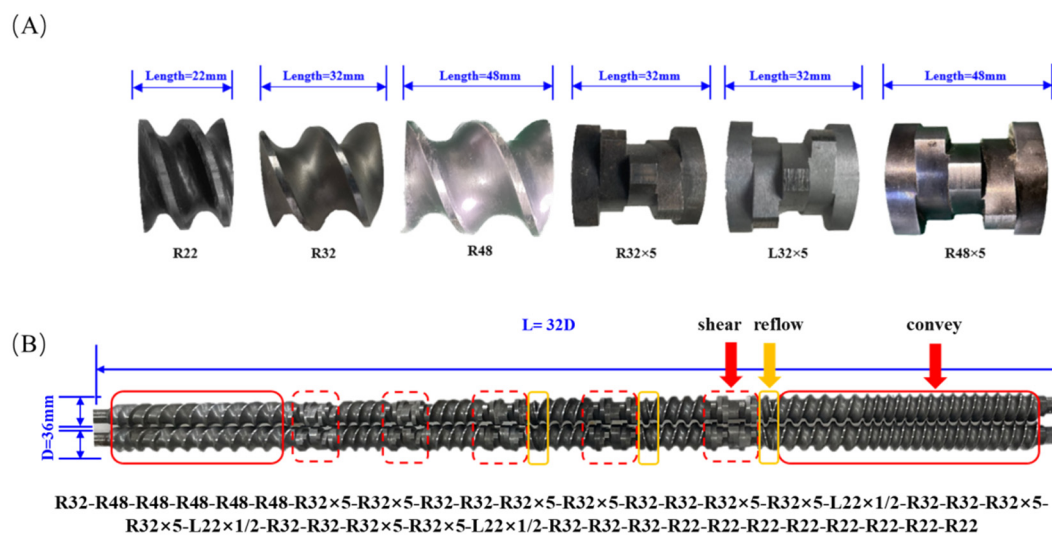

**Figure S1.** Screw elements and design of the screw configuration.

Supplement: s1 [file s1]
